# Supplementary material for: The hydrogenation of 1,3-pentadiene over an alumina-supported palladium catalyst: an FTIR study
Source: Royal Society of Chemistry journal article supplement (doi:10.1039/b413178a), 2004-01-01
Supplement: b413178a-esi.pdf [file b413178a-esi.pdf]

### Electronic Supplementary Information for PCCP

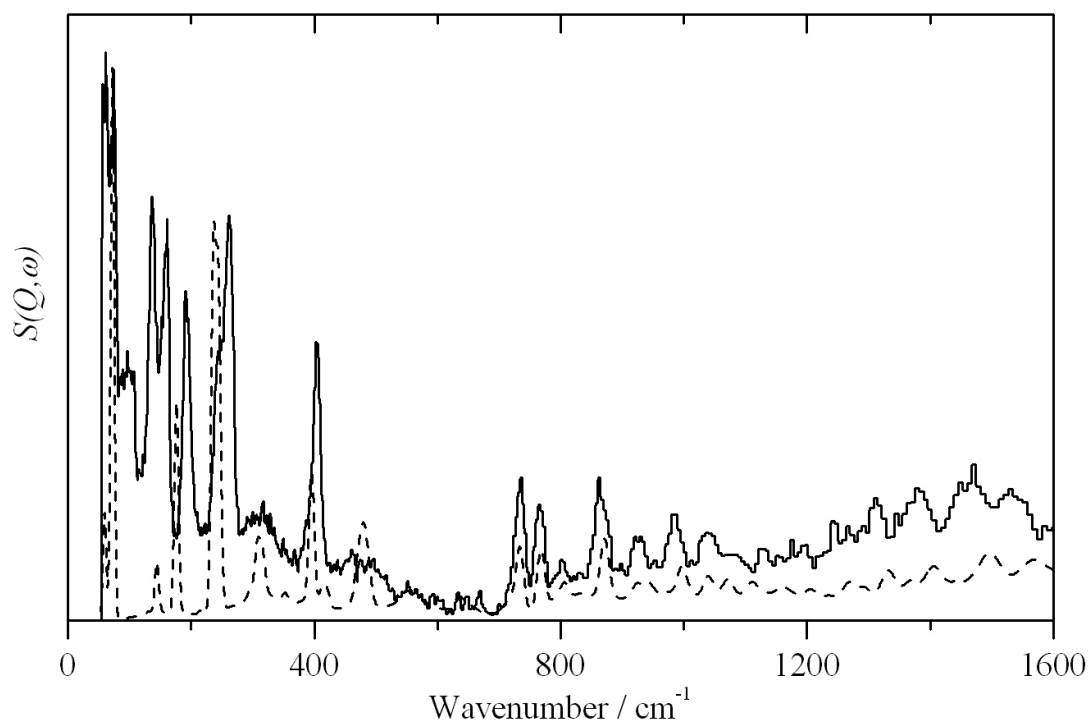

**Figure S1.** Comparison of the inelastic neutron scattering spectrum of pentane (solid line) with that calculated by DFT (B3LYP/6-31G\*(d,p)) (dashed line).

**Tables.**

Table S1: Comparison of observed and calculated positions and intensities of *cis*-1,3-pentadiene

| Observed                    |                    |                 | DFT                         |                                           |                                                    | Assignment                        |
|-----------------------------|--------------------|-----------------|-----------------------------|-------------------------------------------|----------------------------------------------------|-----------------------------------|
| Position / cm <sup>-1</sup> | Infrared intensity | Raman intensity | Position / cm <sup>-1</sup> | Infrared intensity / km mol <sup>-1</sup> | Raman intensity / Å <sup>4</sup> amu <sup>-1</sup> |                                   |
| A'' modes                   |                    |                 |                             |                                           |                                                    |                                   |
|                             |                    |                 | 118                         | 0.9                                       | 0.4                                                | Methyl torsion                    |
| 140                         |                    | vw              | 144                         | 0.1                                       | 2.0                                                | =C-C= torsion                     |
| 353                         | vw                 | vw              | 361                         | 0.5                                       | 2.1                                                | Out-of-plane skeletal deformation |
| 621                         | s                  | w               | 643                         | 32.5                                      | 1.7                                                | <i>cis</i> -CH=CH wag             |
| 777                         | s                  | w               | 802                         | 7.4                                       | 1.3                                                | <i>cis</i> -CH=CH wag             |
| 905                         | vs                 | w               | 933                         | 54.6                                      | 8.1                                                | CH <sub>2</sub> wag               |
|                             |                    |                 | 992                         | 1.1                                       | 4.5                                                | =CH out-of-plane deformation      |
| 997                         | s                  |                 | 1038                        | 15.8                                      | 0.1                                                | =CH out-of-plane deformation      |
| 1035                        | w                  | w               | 1059                        | 1.7                                       | 3.9                                                | Methyl rock                       |
| 1452                        | w                  | m               | 1482                        | 7.7                                       | 6.9                                                | Asymmetric methyl deformation     |
| 2949                        | w                  | vw              | 3052                        | 18.3                                      | 126.1                                              | Methyl C-H stretch                |
|                             |                    |                 |                             |                                           |                                                    |                                   |
| A' modes                    |                    |                 |                             |                                           |                                                    |                                   |
| 214                         | vw                 | vw              | 217                         | 1.7                                       | 0.2                                                | In-plane skeletal deformation d   |
| 385                         | m                  | m               | 390                         | 4.3                                       | 7.8                                                | In-plane skeletal deformation     |
| 612                         |                    | w               | 618                         | 5.0                                       | 4.1                                                | In-plane skeletal deformation     |
| 884                         | w                  | m               | 891                         | 4.0                                       | 3.3                                                | =CH <sub>2</sub> rock             |

|      |    |    |      |      |       |                                           |
|------|----|----|------|------|-------|-------------------------------------------|
| 954  | w  |    | 964  | 12.6 | 1.5   | C-CH <sub>3</sub><br>stretch              |
| 1127 | w  | w  | 1063 | 0.1  | 1.9   | Methyl rock                               |
| 1166 | w  | m  | 1188 | 1.5  | 18.3  | =CH-CH=<br>stretch                        |
| 1251 | w  | s  | 1289 | 2.4  | 91.9  | -CH= bend                                 |
| 1297 | w  | s  | 1323 | 0.8  | 33.0  | -CH= bend                                 |
| 1358 | w  | w  | 1394 | 1.9  | 3.0   | =CH-CH=<br>stretch                        |
| 1390 | m  | m  | 1417 | 3.3  | 25.9  | Symmetric<br>methyl<br>deformation        |
| 1437 | m  | w  | 1469 | 15.8 | 6.8   | =CH <sub>2</sub><br>scissors              |
|      |    |    | 1491 | 8.6  | 67.1  | Asymmetric<br>methyl<br>deformation       |
| 1603 | s  | m  | 1651 | 6.3  | 18.0  | C=C<br>asymmetric<br>stretch              |
| 1655 | m  | vs | 1705 | 13.6 | 468.3 | C=C<br>symmetric<br>stretch               |
| 2928 | m  | m  | 3015 | 29.6 | 290.3 | Symmetric<br>methyl C-H<br>stretch        |
| 2970 | vw | w  | 3107 | 5.7  | 60.7  | Asymmetric<br>methyl C-H<br>stretch       |
| 2990 |    | w  | 3124 | 4.6  | 38.6  | Symmetric<br>=C-H<br>stretch              |
| 3010 |    | s  | 3130 | 8.4  | 67.5  | Symmetric<br>=CH <sub>2</sub><br>stretch  |
| 3033 | s  |    | 3143 | 16.7 | 224.8 | Symmetric<br>-CH=<br>stretch              |
| 3068 | w  |    | 3152 | 28.1 | 19.8  | Asymmetric<br>-CH=<br>stretch             |
| 3097 | m  | m  | 3219 | 15.0 | 89.6  | Asymmetric<br>=CH <sub>2</sub><br>stretch |

Table S2: Comparison of observed and calculated positions and intensities of *trans*-1,3-pentadiene

| Observed                    |                    |                 | DFT                         |                                           |                                                  | Assignment                        |
|-----------------------------|--------------------|-----------------|-----------------------------|-------------------------------------------|--------------------------------------------------|-----------------------------------|
| Position / $\text{cm}^{-1}$ | Infrared intensity | Raman intensity | Position / $\text{cm}^{-1}$ | Infrared intensity / $\text{km mol}^{-1}$ | Raman intensity / $\text{\AA}^4 \text{amu}^{-1}$ |                                   |
| A'' modes                   |                    |                 |                             |                                           |                                                  |                                   |
| 150                         |                    | vw              | 136                         | 1.6                                       | 0.4                                              | Out-of-plane skeletal deformation |
| 205                         | vw                 | w               | 208                         | 0.2                                       | 0.8                                              | Methyl torsion                    |
| 250                         | m                  | w               | 259                         | 2.2                                       | 0.2                                              | Out-of-plane skeletal deformation |
| 698                         | w                  |                 | 647                         | 3.4                                       | 0.1                                              | Out-of-plane skeletal deformation |
|                             |                    |                 | 847                         | 8.0                                       | 7.0                                              | =CH out-of-plane deformation      |
| 899                         | s                  | w               | 926                         | 41.7                                      | 11.0                                             | CH <sub>2</sub> wag               |
| 948                         | m                  | vvw             | 978                         | 15.6                                      | 0.5                                              | =CH out-of-plane deformation      |
| 1003                        | vs                 |                 | 1041                        | 47.8                                      | 1.2                                              | =CH out-of-plane deformation      |
| 1043                        | vw                 | w               | 1063                        | 0.5                                       | 3.1                                              | Methyl rock                       |
| 1435                        | w                  | vw              | 1478                        | 8.3                                       | 8.5                                              | Asymmetric methyl deformation     |
| 2946                        | w                  | w               | 3050                        | 19.5                                      | 137.3                                            | Methyl C-H stretch                |
|                             |                    |                 |                             |                                           |                                                  |                                   |
| A' modes                    |                    |                 |                             |                                           |                                                  |                                   |
| 383                         | vw                 | vw              | 198                         | 1.8                                       | 1.0                                              | In-plane skeletal deformation     |
| 454                         | w                  | vw              | 454                         | 0.5                                       | 1.2                                              | In-plane skeletal deformation     |

|      |    |    |      |      |       |                                     |
|------|----|----|------|------|-------|-------------------------------------|
| 483  | vw | s  | 483  | 0.1  | 13.4  | In-plane skeletal deformation       |
| 630  | w  |    | 908  | 7.1  | 1.2   | =CH <sub>2</sub> rock               |
| 977  | w  | vw | 990  | 10.8 | 1.1   |                                     |
| 1082 |    | w  | 1097 | 0.1  | 0.6   | C-CH <sub>3</sub> stretch           |
| 1170 |    | w  | 1207 | 1.7  | 77.0  | =CH-CH= stretch                     |
| 1180 |    | m  | 1298 | 1.6  | 0.2   | -CH= bend                           |
| 1280 | w  | s  | 1318 | 1.0  | 87.1  | -CH= bend                           |
| 1306 | m  |    | 1335 | 3.1  | 0.8   | -CH= bend                           |
| 1376 | m  | w  | 1412 | 2.8  | 38.9  | Symmetric methyl deformation        |
| 1420 | m  | w  | 1451 | 5.0  | 17.3  | =CH <sub>2</sub> scissors           |
| 1449 | m  | w  | 1491 | 11.3 | 56.3  | Asymmetric methyl deformation       |
| 1608 | m  |    | 1660 | 10.0 | 43.7  | C=C asymmetric stretch              |
| 1660 | m  | vs | 1711 | 21.3 | 521.1 | C=C symmetric stretch               |
| 2931 | m  | w  | 3009 | 36.4 | 356.1 | Symmetric methyl C-H stretch        |
| 2973 | m  | vw | 3091 | 10.1 | 95.1  | Asymmetric methyl C-H stretch       |
| 2980 | w  |    | 3116 | 1.5  | 137.9 | Symmetric =C-H stretch              |
| 2997 |    | s  | 3121 | 9.8  | 13.4  | Symmetric =CH <sub>2</sub> stretch  |
| 3018 | s  | vw | 3130 | 47.8 | 10.6  | Symmetric -CH= stretch              |
| 3050 | w  |    | 3134 | 5.9  | 156.8 | Asymmetric -CH= stretch             |
| 3098 | m  | w  | 3219 | 14.3 | 93.3  | Asymmetric =CH <sub>2</sub> stretch |
